# Supplementary material for: Einbezug von Mitarbeitenden, Bewohnenden und Angehörigen in die digitale Transformation im stationären Altersbereich
Source: Atypon-hosted journal article supplement (doi:10.1024/1012-5302/a000852), 2021-11-19
Supplement: 1012-5302_a000852_esm1.pdf [file 1012-5302_a000852_esm1.pdf]

## Variablenspiegel (Variablen-Liste und Codierung)

### v1

Wie stark treffen folgende Aussagen auf Sie **persönlich** zu?

Skalenniveau: ordinal

0 - explicit missing (weiss nicht)

leeres Feld - implicit missing (nicht ausgefüllt)

1 - Trifft gar nicht zu (1) 2 - Trifft eher nicht zu (2) 3 - Teils - teils (3) 4 - Trifft eher zu (4) 5 - Trifft voll und ganz zu (5)

- v1 - Teilfrage: Das Bedienen moderner technischer Geräte fällt mir leicht.
- v1U2 - Teilfrage: Technischen Neuerungen sehe ich mit Zuversicht entgegen.
- v1U3 - Teilfrage: Hinsichtlich technischer Neuerungen bin ich sehr neugierig.
- v1U4 - Teilfrage: In meinem **Arbeitsfeld** ist die Nutzung von technischen Neuerungen wichtig.
- v1U5 - Teilfrage: Das Nutzen von technischen Neuerungen ist sachdienlich für **meine Arbeit**.

### v2

#### Spalte Welche Form von Internetzugang wird angeboten?

Im Folgenden interessiert uns, ob und wie Sie den Internetzugang für Ihr **Klientel** und Ihre **Mitarbeitenden** anbieten.

Skalenniveau: nominal

leeres Feld - implicit missing (nicht ausgefüllt)

1 - WLAN

2 - Kabel

3 - WLAN und Kabel

4 - Kein Internetzugang vorhanden

- v2 - Komplexe Teilfrage: Im Folgenden interessiert uns, ob und wie Sie den Internetzugang für Ihr **Klientel** und Ihre **Mitarbeitenden** anbieten. §Für das **Klientel**
- v2U2 - Teilfrage: Im Folgenden interessiert uns, ob und wie Sie den Internetzugang für Ihr **Klientel** und Ihre **Mitarbeitenden** anbieten. §Für die **Mitarbeitenden**

### v3

#### Spalte Ist der Internetanschluss kostenpflichtig (monatliche Gebühren)?

Im Folgenden interessiert uns, ob und wie Sie den Internetzugang für Ihr **Klientel** und Ihre **Mitarbeitenden** anbieten.

Skalenniveau: nominal

leeres Feld - implicit missing (nicht ausgefüllt)

1 - Ja

2 - Nein

3 - Kein Internetzugang vorhanden

- v3 - Komplexe Teilfrage: Im Folgenden interessiert uns, ob und wie Sie den Internetzugang für Ihr **Klientel** und Ihre **Mitarbeitenden** anbieten. §Für das **Klientel**
- v3U2 - Teilfrage: Im Folgenden interessiert uns, ob und wie Sie den Internetzugang für Ihr **Klientel** und Ihre **Mitarbeitenden** anbieten. §Für die **Mitarbeitenden**

### v4

#### Spalte Ist der Internetzugang eingeschränkt (z.B. Jugendschutzfreigaben, Zeit)?

Im Folgenden interessiert uns, ob und wie Sie den Internetzugang für Ihr **Klientel** und Ihre **Mitarbeitenden** anbieten.

Skalenniveau: nominal

leeres Feld - implicit missing (nicht ausgefüllt)

1 - Ja (generell)

2 - Nein (generell)

3 - Teilweise (je nach Situation/Person)

4 - Kein Internetzugang vorhanden

- v4 - Komplexe Teilfrage: Im Folgenden interessiert uns, ob und wie Sie den Internetzugang für Ihr **Klientel** und Ihre **Mitarbeitenden** anbieten. §Für das **Klientel**
- v4U2 - Teilfrage: Im Folgenden interessiert uns, ob und wie Sie den Internetzugang für Ihr **Klientel** und Ihre **Mitarbeitenden** anbieten. §Für die **Mitarbeitenden**

### v5

#### Spalte Spalte 4

Welche der folgenden technischen Mittel wenden Sie in **Ihrer Institution** im Bereich *Administration* an? Und wie nützlich finden Sie diese?

Falls Sie eine Technologie nicht einsetzen, bewerten Sie bitte trotzdem ihre Nützlichkeit.

Skalenniveau: nominal

0 - explicit missing (weiss nicht)

leeres Feld - implicit missing (nicht ausgefüllt)

1 - Ja

2 - Nein

- v5 - Komplexe Teilfrage: Welche der folgenden technischen Mittel wenden Sie in **Ihrer Institution** im Bereich *Administration* an? Und wie nützlich finden Sie diese? Falls Sie eine Technologie nicht einsetzen, bewerten Sie bitte trotzdem ihre Nützlichkeit. §Softwarelösungen im Bereich Verwaltung (z.B. SAP)
- v5U2 - Teilfrage: Welche der folgenden technischen Mittel wenden Sie in **Ihrer Institution** im Bereich *Administration* an? Und wie nützlich finden Sie diese? Falls Sie eine Technologie nicht einsetzen, bewerten Sie bitte trotzdem ihre Nützlichkeit. §Roboter (z.B. im Bereich der Logistik oder Service)
- v5U3 - Teilfrage: Welche der folgenden technischen Mittel wenden Sie in **Ihrer Institution** im Bereich *Administration* an? Und wie nützlich finden Sie diese? Falls Sie eine Technologie nicht einsetzen, bewerten Sie bitte trotzdem ihre Nützlichkeit. §Wissensmanagement (z.B. Wikis)
- v5U4 - Teilfrage: Welche der folgenden technischen Mittel wenden Sie in **Ihrer Institution** im Bereich *Administration* an? Und wie nützlich finden Sie diese? Falls Sie eine Technologie nicht einsetzen, bewerten Sie bitte trotzdem ihre Nützlichkeit. §Automatisiertes Bestell-/Rechnungswesen
- v5U5 - Teilfrage: Welche der folgenden technischen Mittel wenden Sie in **Ihrer Institution** im Bereich *Administration* an? Und wie nützlich finden Sie diese? Falls Sie eine Technologie nicht einsetzen, bewerten Sie bitte trotzdem ihre Nützlichkeit. §NFC (near-field communication) Technik zur Erfassung von Zeiten und Leistungen (Badge)
- v5U6 - Teilfrage: Welche der folgenden technischen Mittel wenden Sie in **Ihrer Institution** im Bereich *Administration* an? Und wie nützlich finden Sie diese? Falls Sie eine Technologie nicht einsetzen, bewerten Sie bitte trotzdem ihre Nützlichkeit. §Automatisiertes Reporting und Controlling (auch Statistiken)
- v5U7 - Teilfrage: Welche der folgenden technischen Mittel wenden Sie in **Ihrer Institution** im Bereich *Administration* an? Und wie nützlich finden Sie diese? Falls Sie eine Technologie nicht einsetzen, bewerten Sie bitte trotzdem ihre Nützlichkeit. §Elektronischer Newsletter/Kalender

## v6

### Spalte Spalte 5

Welche der folgenden technischen Mittel wenden Sie in **Ihrer Institution** im Bereich *Administration* an? Und wie nützlich finden Sie diese? Falls Sie eine Technologie nicht einsetzen, bewerten Sie bitte trotzdem ihre Nützlichkeit.

Skalenniveau: nominal

0 - explicit missing (weiss nicht)

leeres Feld - implicit missing (nicht ausgefüllt)

1 - Finde ich gar nicht nützlich (1)

2 - 2

3 - 3

4 - 4

5 - Finde ich sehr nützlich (5)

- v6 - Komplexe Teilfrage: Welche der folgenden technischen Mittel wenden Sie in **Ihrer Institution** im Bereich *Administration* an? Und wie nützlich finden Sie diese? Falls Sie eine Technologie nicht einsetzen, bewerten Sie bitte trotzdem ihre Nützlichkeit. §Softwarelösungen im Bereich Verwaltung (z.B. SAP)
- v6U2 - Teilfrage: Welche der folgenden technischen Mittel wenden Sie in **Ihrer Institution** im Bereich *Administration* an? Und wie nützlich finden Sie diese? Falls Sie eine Technologie nicht einsetzen, bewerten Sie bitte trotzdem ihre Nützlichkeit. §Roboter (z.B. im Bereich der Logistik oder Service)
- v6U3 - Teilfrage: Welche der folgenden technischen Mittel wenden Sie in **Ihrer Institution** im Bereich *Administration* an? Und wie nützlich finden Sie diese? Falls Sie eine Technologie nicht einsetzen, bewerten Sie bitte trotzdem ihre Nützlichkeit. §Wissensmanagement (z.B. Wikis)
- v6U4 - Teilfrage: Welche der folgenden technischen Mittel wenden Sie in **Ihrer Institution** im Bereich *Administration* an? Und wie nützlich finden Sie diese? Falls Sie eine Technologie nicht einsetzen, bewerten Sie bitte trotzdem ihre Nützlichkeit. §Automatisiertes Bestell-/Rechnungswesen
- v6U5 - Teilfrage: Welche der folgenden technischen Mittel wenden Sie in **Ihrer Institution** im Bereich *Administration* an? Und wie nützlich finden Sie diese? Falls Sie eine Technologie nicht einsetzen, bewerten Sie bitte trotzdem ihre Nützlichkeit. §NFC (near-field communication) Technik zur Erfassung von Zeiten und Leistungen (Badge)
- v6U6 - Teilfrage: Welche der folgenden technischen Mittel wenden Sie in **Ihrer Institution** im Bereich *Administration* an? Und wie nützlich finden Sie diese? Falls Sie eine Technologie nicht einsetzen, bewerten Sie bitte trotzdem ihre Nützlichkeit. §Automatisiertes Reporting und Controlling (auch Statistiken)
- v6U7 - Teilfrage: Welche der folgenden technischen Mittel wenden Sie in **Ihrer Institution** im Bereich *Administration* an? Und wie nützlich finden Sie diese? Falls Sie eine Technologie nicht einsetzen, bewerten Sie bitte trotzdem ihre Nützlichkeit. §Elektronischer Newsletter/Kalender

## v7

### Spalte Spalte 6

Welche der folgenden technischen Mittel wenden Sie in **Ihrer Institution** im Bereich *Unterhaltung, Aktivierung und Entwicklung der Klientel* an? Und wie nützlich finden Sie diese? Falls Sie eine Technologie nicht einsetzen, bewerten Sie bitte trotzdem ihre Nützlichkeit.

Skalenniveau: nominal

0 - explicit missing (weiss nicht)

leeres Feld - implicit missing (nicht ausgefüllt)

1 - Ja

2 - Nein

- v7 - Komplexe Teilfrage: Welche der folgenden technischen Mittel wenden Sie in **Ihrer Institution** im Bereich *Unterhaltung, Aktivierung und Entwicklung der Klientel* an? Und wie nützlich finden Sie diese? Falls Sie eine Technologie nicht einsetzen, bewerten Sie bitte trotzdem ihre Nützlichkeit. §TV

- v7U2 - Teilfrage: Welche der folgenden technischen Mittel wenden Sie in **Ihrer Institution** im Bereich *Unterhaltung, Aktivierung und Entwicklung der Klientel* an? Und wie nützlich finden Sie diese? Falls Sie eine Technologie nicht einsetzen, bewerten Sie bitte trotzdem ihre Nützlichkeit. § Smartphone
- v7U3 - Teilfrage: Welche der folgenden technischen Mittel wenden Sie in **Ihrer Institution** im Bereich *Unterhaltung, Aktivierung und Entwicklung der Klientel* an? Und wie nützlich finden Sie diese? Falls Sie eine Technologie nicht einsetzen, bewerten Sie bitte trotzdem ihre Nützlichkeit. § Computer
- v7U4 - Teilfrage: Welche der folgenden technischen Mittel wenden Sie in **Ihrer Institution** im Bereich *Unterhaltung, Aktivierung und Entwicklung der Klientel* an? Und wie nützlich finden Sie diese? Falls Sie eine Technologie nicht einsetzen, bewerten Sie bitte trotzdem ihre Nützlichkeit. § Tablet
- v7U5 - Teilfrage: Welche der folgenden technischen Mittel wenden Sie in **Ihrer Institution** im Bereich *Unterhaltung, Aktivierung und Entwicklung der Klientel* an? Und wie nützlich finden Sie diese? Falls Sie eine Technologie nicht einsetzen, bewerten Sie bitte trotzdem ihre Nützlichkeit. § Spielkonsolen
- v7U6 - Teilfrage: Welche der folgenden technischen Mittel wenden Sie in **Ihrer Institution** im Bereich *Unterhaltung, Aktivierung und Entwicklung der Klientel* an? Und wie nützlich finden Sie diese? Falls Sie eine Technologie nicht einsetzen, bewerten Sie bitte trotzdem ihre Nützlichkeit. § Trainingsgeräte (z.B. Trainings- oder Aktivierungsroboter)
- v7U7 - Teilfrage: Welche der folgenden technischen Mittel wenden Sie in **Ihrer Institution** im Bereich *Unterhaltung, Aktivierung und Entwicklung der Klientel* an? Und wie nützlich finden Sie diese? Falls Sie eine Technologie nicht einsetzen, bewerten Sie bitte trotzdem ihre Nützlichkeit. § Lern- / Trainingssoftware
- v7U8 - Teilfrage: Welche der folgenden technischen Mittel wenden Sie in **Ihrer Institution** im Bereich *Unterhaltung, Aktivierung und Entwicklung der Klientel* an? Und wie nützlich finden Sie diese? Falls Sie eine Technologie nicht einsetzen, bewerten Sie bitte trotzdem ihre Nützlichkeit. § Streaming-Dienste (Netflix/Spotify)
- v7U9 - Teilfrage: Welche der folgenden technischen Mittel wenden Sie in **Ihrer Institution** im Bereich *Unterhaltung, Aktivierung und Entwicklung der Klientel* an? Und wie nützlich finden Sie diese? Falls Sie eine Technologie nicht einsetzen, bewerten Sie bitte trotzdem ihre Nützlichkeit. § Kommunikationsunterstützende Technologie (z.B. Sprachcomputer)

## v8

### Spalte Spalte 7

Welche der folgenden technischen Mittel wenden Sie in **Ihrer Institution** im Bereich *Unterhaltung, Aktivierung und Entwicklung der Klientel* an? Und wie nützlich finden Sie diese? Falls Sie eine Technologie nicht einsetzen, bewerten Sie bitte trotzdem ihre Nützlichkeit.

Skalenniveau: nominal

0 - explicit missing (weiss nicht)

leeres Feld - implicit missing (nicht ausgefüllt)

- 1 - Finde ich gar nicht nützlich (1)
- 2 - 2
- 3 - 3
- 4 - 4
- 5 - Finde ich sehr nützlich (5)
- v8 - Komplexe Teilfrage: Welche der folgenden technischen Mittel wenden Sie in **Ihrer Institution** im Bereich *Unterhaltung, Aktivierung und Entwicklung der Klientel* an? Und wie nützlich finden Sie diese? Falls Sie eine Technologie nicht einsetzen, bewerten Sie bitte trotzdem ihre Nützlichkeit. § TV
- v8U2 - Teilfrage: Welche der folgenden technischen Mittel wenden Sie in **Ihrer Institution** im Bereich *Unterhaltung, Aktivierung und Entwicklung der Klientel* an? Und wie nützlich finden Sie diese? Falls Sie eine Technologie nicht einsetzen, bewerten Sie bitte trotzdem ihre Nützlichkeit. § Smartphone
- v8U3 - Teilfrage: Welche der folgenden technischen Mittel wenden Sie in **Ihrer Institution** im Bereich *Unterhaltung, Aktivierung und Entwicklung der Klientel* an? Und wie nützlich finden Sie diese? Falls Sie eine Technologie nicht einsetzen, bewerten Sie bitte trotzdem ihre Nützlichkeit. § Computer
- v8U4 - Teilfrage: Welche der folgenden technischen Mittel wenden Sie in **Ihrer Institution** im Bereich *Unterhaltung, Aktivierung und Entwicklung der Klientel* an? Und wie nützlich finden Sie diese? Falls Sie eine Technologie nicht einsetzen, bewerten Sie bitte trotzdem ihre Nützlichkeit. § Tablet
- v8U5 - Teilfrage: Welche der folgenden technischen Mittel wenden Sie in **Ihrer Institution** im Bereich *Unterhaltung, Aktivierung und Entwicklung der Klientel* an? Und wie nützlich finden Sie diese? Falls Sie eine Technologie nicht einsetzen, bewerten Sie bitte trotzdem ihre Nützlichkeit. § Spielkonsolen
- v8U6 - Teilfrage: Welche der folgenden technischen Mittel wenden Sie in **Ihrer Institution** im Bereich *Unterhaltung, Aktivierung und Entwicklung der Klientel* an? Und wie nützlich finden Sie diese? Falls Sie eine Technologie nicht einsetzen, bewerten Sie bitte trotzdem ihre Nützlichkeit. § Trainingsgeräte (z.B. Trainings- oder Aktivierungsroboter)
- v8U7 - Teilfrage: Welche der folgenden technischen Mittel wenden Sie in **Ihrer Institution** im Bereich *Unterhaltung, Aktivierung und Entwicklung der Klientel* an? Und wie nützlich finden Sie diese? Falls Sie eine Technologie nicht einsetzen, bewerten Sie bitte trotzdem ihre Nützlichkeit. § Lern- / Trainingssoftware
- v8U8 - Teilfrage: Welche der folgenden technischen Mittel wenden Sie in **Ihrer Institution** im Bereich *Unterhaltung, Aktivierung und Entwicklung der Klientel* an? Und wie nützlich finden Sie diese? Falls Sie eine Technologie nicht einsetzen, bewerten Sie bitte trotzdem ihre Nützlichkeit. § Streaming-Dienste (Netflix/Spotify)
- v8U9 - Teilfrage: Welche der folgenden technischen Mittel wenden Sie in **Ihrer Institution** im Bereich *Unterhaltung, Aktivierung und Entwicklung der Klientel* an? Und wie nützlich finden Sie diese? Falls Sie eine Technologie nicht einsetzen, bewerten Sie bitte trotzdem ihre Nützlichkeit. § Kommunikationsunterstützende Technologie (z.B. Sprachcomputer)

v9

Spalte Spalte 8

Welche der folgenden technischen Mittel wenden Sie in **Ihrer Institution** im Bereich *Bildung, Arbeit und Tagesgestaltung der Klientel* an? Und wie nützlich finden Sie diese? Falls Sie eine Technologie nicht einsetzen, bewerten Sie bitte trotzdem ihre Nützlichkeit.

Skalenniveau: nominal

0 - explicit missing (weiss nicht)

leeres Feld - implicit missing (nicht ausgefüllt)

1 - Ja

2 - Nein

■ v9 - Komplexe Teilfrage: Welche der folgenden technischen Mittel wenden Sie in **Ihrer Institution** im Bereich *Bildung, Arbeit und Tagesgestaltung der Klientel* an? Und wie nützlich finden Sie diese? Falls Sie eine Technologie nicht einsetzen, bewerten Sie bitte trotzdem ihre Nützlichkeit. § Smartphone/Tablet für die Schule oder am Arbeitsplatz

■ v9U2 - Teilfrage: Welche der folgenden technischen Mittel wenden Sie in **Ihrer Institution** im Bereich *Bildung, Arbeit und Tagesgestaltung der Klientel* an? Und wie nützlich finden Sie diese? Falls Sie eine Technologie nicht einsetzen, bewerten Sie bitte trotzdem ihre Nützlichkeit. § Arbeitsroboter

■ v9U3 - Teilfrage: Welche der folgenden technischen Mittel wenden Sie in **Ihrer Institution** im Bereich *Bildung, Arbeit und Tagesgestaltung der Klientel* an? Und wie nützlich finden Sie diese? Falls Sie eine Technologie nicht einsetzen, bewerten Sie bitte trotzdem ihre Nützlichkeit. § Kommunikationsunterstützende Technologie (z.B. Sprachcomputer)

■ v9U4 - Teilfrage: Welche der folgenden technischen Mittel wenden Sie in **Ihrer Institution** im Bereich *Bildung, Arbeit und Tagesgestaltung der Klientel* an? Und wie nützlich finden Sie diese? Falls Sie eine Technologie nicht einsetzen, bewerten Sie bitte trotzdem ihre Nützlichkeit. § Schul- oder Arbeitscomputer

■ v9U5 - Teilfrage: Welche der folgenden technischen Mittel wenden Sie in **Ihrer Institution** im Bereich *Bildung, Arbeit und Tagesgestaltung der Klientel* an? Und wie nützlich finden Sie diese? Falls Sie eine Technologie nicht einsetzen, bewerten Sie bitte trotzdem ihre Nützlichkeit. § Lern-/Trainingssoftware

■ v9U6 - Teilfrage: Welche der folgenden technischen Mittel wenden Sie in **Ihrer Institution** im Bereich *Bildung, Arbeit und Tagesgestaltung der Klientel* an? Und wie nützlich finden Sie diese? Falls Sie eine Technologie nicht einsetzen, bewerten Sie bitte trotzdem ihre Nützlichkeit. § Technik für die Mobilität am Arbeitsplatz/der Schule

v10

Spalte Spalte 9

Welche der folgenden technischen Mittel wenden Sie in **Ihrer Institution** im Bereich *Bildung, Arbeit und Tagesgestaltung der Klientel* an? Und wie nützlich finden Sie diese? Falls Sie eine Technologie nicht einsetzen, bewerten Sie bitte trotzdem ihre Nützlichkeit.

Skalenniveau: nominal

0 - explicit missing (weiss nicht)

leeres Feld - implicit missing (nicht ausgefüllt)

1 - Finde ich gar nicht nützlich (1)

2 - 2

3 - 3

4 - 4

5 - Finde ich sehr nützlich (5)

■ v10 - Komplexe Teilfrage: Welche der folgenden technischen Mittel wenden Sie in **Ihrer Institution** im Bereich *Bildung, Arbeit und Tagesgestaltung der Klientel* an? Und wie nützlich finden Sie diese? Falls Sie eine Technologie nicht einsetzen, bewerten Sie bitte trotzdem ihre Nützlichkeit. § Smartphone/Tablet für die Schule oder am Arbeitsplatz

■ v10U2 - Teilfrage: Welche der folgenden technischen Mittel wenden Sie in **Ihrer Institution** im Bereich *Bildung, Arbeit und Tagesgestaltung der Klientel* an? Und wie nützlich finden Sie diese? Falls Sie eine Technologie nicht einsetzen, bewerten Sie bitte trotzdem ihre Nützlichkeit. § Arbeitsroboter

■ v10U3 - Teilfrage: Welche der folgenden technischen Mittel wenden Sie in **Ihrer Institution** im Bereich *Bildung, Arbeit und Tagesgestaltung der Klientel* an? Und wie nützlich finden Sie diese? Falls Sie eine Technologie nicht einsetzen, bewerten Sie bitte trotzdem ihre Nützlichkeit. § Kommunikationsunterstützende Technologie (z.B. Sprachcomputer)

■ v10U4 - Teilfrage: Welche der folgenden technischen Mittel wenden Sie in **Ihrer Institution** im Bereich *Bildung, Arbeit und Tagesgestaltung der Klientel* an? Und wie nützlich finden Sie diese? Falls Sie eine Technologie nicht einsetzen, bewerten Sie bitte trotzdem ihre Nützlichkeit. § Schul- oder Arbeitscomputer

■ v10U5 - Teilfrage: Welche der folgenden technischen Mittel wenden Sie in **Ihrer Institution** im Bereich *Bildung, Arbeit und Tagesgestaltung der Klientel* an? Und wie nützlich finden Sie diese? Falls Sie eine Technologie nicht einsetzen, bewerten Sie bitte trotzdem ihre Nützlichkeit. § Lern-/Trainingssoftware

■ v10U6 - Teilfrage: Welche der folgenden technischen Mittel wenden Sie in **Ihrer Institution** im Bereich *Bildung, Arbeit und Tagesgestaltung der Klientel* an? Und wie nützlich finden Sie diese? Falls Sie eine Technologie nicht einsetzen, bewerten Sie bitte trotzdem ihre Nützlichkeit. § Technik für die Mobilität am Arbeitsplatz/der Schule

v11

Spalte Spalte 10

Welche der folgenden technischen Mittel wenden Sie in **Ihrer Institution** im Bereich *Betreuung und Pflege* an? Und wie nützlich finden Sie diese? Falls Sie eine Technologie nicht einsetzen, bewerten Sie bitte trotzdem ihre Nützlichkeit.

Skalenniveau: nominal

0 - explicit missing (weiss nicht)

leeres Feld - implicit missing (nicht ausgefüllt)

1 - Ja

2 - Nein

- v11 - Komplexe Teilfrage: Welche der folgenden technischen Mittel wenden Sie in **Ihrer Institution** im Bereich *Betreuung und Pflege* an? Und wie nützlich finden Sie diese? Falls Sie eine Technologie nicht einsetzen, bewerten Sie bitte trotzdem ihre Nützlichkeit.§Technische Assistenz zur Selbstpflege (z.B. WC-Aufsatz mit Wascheinrichtung)
- v11U2 - Teilfrage: Welche der folgenden technischen Mittel wenden Sie in **Ihrer Institution** im Bereich *Betreuung und Pflege* an? Und wie nützlich finden Sie diese? Falls Sie eine Technologie nicht einsetzen, bewerten Sie bitte trotzdem ihre Nützlichkeit.§Automatisierte Erinnerungs- und Organisationshilfen (z.B. Kalender oder Arbeitsplanung)
- v11U3 - Teilfrage: Welche der folgenden technischen Mittel wenden Sie in **Ihrer Institution** im Bereich *Betreuung und Pflege* an? Und wie nützlich finden Sie diese? Falls Sie eine Technologie nicht einsetzen, bewerten Sie bitte trotzdem ihre Nützlichkeit.§Medikationsspender mit Erinnerungsfunktion
- v11U4 - Teilfrage: Welche der folgenden technischen Mittel wenden Sie in **Ihrer Institution** im Bereich *Betreuung und Pflege* an? Und wie nützlich finden Sie diese? Falls Sie eine Technologie nicht einsetzen, bewerten Sie bitte trotzdem ihre Nützlichkeit.§Roboter zur Entlastung des Personals (z.B. teilautomatisiertes Pflegebett, Service Roboter, Wannenaufzug)
- v11U5 - Teilfrage: Welche der folgenden technischen Mittel wenden Sie in **Ihrer Institution** im Bereich *Betreuung und Pflege* an? Und wie nützlich finden Sie diese? Falls Sie eine Technologie nicht einsetzen, bewerten Sie bitte trotzdem ihre Nützlichkeit.§Roboter zur Aktivierung der Klientel (z.B. Paro, Nao, Pepper)

## v12

Spalte Spalte 11

Welche der folgenden technischen Mittel wenden Sie in **Ihrer Institution** im Bereich *Betreuung und Pflege* an? Und wie nützlich finden Sie diese? Falls Sie eine Technologie nicht einsetzen, bewerten Sie bitte trotzdem ihre Nützlichkeit.

Skalenniveau: nominal

0 - explicit missing (weiss nicht)

leeres Feld - implicit missing (nicht ausgefüllt)

1 - Finde ich gar nicht nützlich (1)

2 - 2

3 - 3

4 - 4

5 - Finde ich sehr nützlich (5)

- v12 - Komplexe Teilfrage: Welche der folgenden technischen Mittel wenden Sie in **Ihrer Institution** im Bereich *Betreuung und Pflege* an? Und wie nützlich finden Sie diese? Falls Sie eine Technologie nicht einsetzen, bewerten Sie bitte trotzdem ihre Nützlichkeit.§Technische Assistenz zur Selbstpflege (z.B. WC-Aufsatz mit Wascheinrichtung)
- v12U2 - Teilfrage: Welche der folgenden technischen Mittel wenden Sie in **Ihrer Institution** im Bereich *Betreuung und Pflege* an? Und wie nützlich finden Sie diese? Falls Sie eine Technologie nicht einsetzen, bewerten Sie bitte trotzdem ihre Nützlichkeit.§Automatisierte Erinnerungs- und Organisationshilfen (z.B. Kalender oder Arbeitsplanung)
- v12U3 - Teilfrage: Welche der folgenden technischen Mittel wenden Sie in **Ihrer Institution** im Bereich *Betreuung und Pflege* an? Und wie nützlich finden Sie diese? Falls Sie eine Technologie nicht einsetzen, bewerten Sie bitte trotzdem ihre Nützlichkeit.§Medikationsspender mit Erinnerungsfunktion
- v12U4 - Teilfrage: Welche der folgenden technischen Mittel wenden Sie in **Ihrer Institution** im Bereich *Betreuung und Pflege* an? Und wie nützlich finden Sie diese? Falls Sie eine Technologie nicht einsetzen, bewerten Sie bitte trotzdem ihre Nützlichkeit.§Roboter zur Entlastung des Personals (z.B. teilautomatisiertes Pflegebett, Service Roboter, Wannenaufzug)
- v12U5 - Teilfrage: Welche der folgenden technischen Mittel wenden Sie in **Ihrer Institution** im Bereich *Betreuung und Pflege* an? Und wie nützlich finden Sie diese? Falls Sie eine Technologie nicht einsetzen, bewerten Sie bitte trotzdem ihre Nützlichkeit.§Roboter zur Aktivierung der Klientel (z.B. Paro, Nao, Pepper)

## v13

Spalte Spalte 12

Welche der folgenden technischen Mittel wenden Sie in **Ihrer Institution** im Bereich *Berichtswesen und Diagnostik* an? Und wie nützlich finden Sie diese? Falls Sie eine Technologie nicht einsetzen, bewerten Sie bitte trotzdem ihre Nützlichkeit.

Skalenniveau: nominal

0 - explicit missing (weiss nicht)

leeres Feld - implicit missing (nicht ausgefüllt)

1 - Ja

2 - Nein

- v13 - Komplexe Teilfrage: Welche der folgenden technischen Mittel wenden Sie in **Ihrer Institution** im Bereich *Berichtswesen und Diagnostik* an? Und wie nützlich finden Sie diese? Falls Sie eine Technologie nicht einsetzen, bewerten Sie bitte trotzdem ihre Nützlichkeit.§Softwarelösung für Diagnostik und Entwicklungsplanung
- v13U2 - Teilfrage: Welche der folgenden technischen Mittel wenden Sie in **Ihrer Institution** im Bereich *Berichtswesen und Diagnostik* an? Und wie nützlich finden Sie diese? Falls Sie eine Technologie nicht einsetzen, bewerten Sie bitte trotzdem ihre Nützlichkeit.§Spezialisierte Softwarelösungen im Bereich Berichtswesen
- v13U3 - Teilfrage: Welche der folgenden technischen Mittel wenden Sie in **Ihrer Institution** im Bereich *Berichtswesen und Diagnostik* an? Und wie nützlich finden Sie diese? Falls Sie eine Technologie nicht einsetzen, bewerten Sie bitte trotzdem ihre Nützlichkeit.§Telekonsultation ("Telemedizin")
- v13U4 - Teilfrage: Welche der folgenden technischen Mittel wenden Sie in **Ihrer Institution** im Bereich *Berichtswesen und Diagnostik* an? Und wie nützlich finden Sie diese? Falls Sie eine Technologie nicht einsetzen, bewerten Sie bitte trotzdem ihre Nützlichkeit.§Automatisierte Kontrolle von Vitalfunktionen (z.B. Blutzuckermessung, Fitness Tracker)



- v13U5 - Teilfrage: Welche der folgenden technischen Mittel wenden Sie in **Ihrer Institution** im Bereich *Berichtswesen und Diagnostik* an? Und wie nützlich finden Sie diese? Falls Sie eine Technologie nicht einsetzen, bewerten Sie bitte trotzdem ihre Nützlichkeit. §Spezialisierte Softwarelösungen im Bereich interne Dokumentation (z.B. Journal, ePflegedokumentation)
- v13U6 - Teilfrage: Welche der folgenden technischen Mittel wenden Sie in **Ihrer Institution** im Bereich *Berichtswesen und Diagnostik* an? Und wie nützlich finden Sie diese? Falls Sie eine Technologie nicht einsetzen, bewerten Sie bitte trotzdem ihre Nützlichkeit. §Cloud-Lösung für Daten der Klientel

## v14

### Spalte Spalte 13

Welche der folgenden technischen Mittel wenden Sie in **Ihrer Institution** im Bereich *Berichtswesen und Diagnostik* an? Und wie nützlich finden Sie diese? Falls Sie eine Technologie nicht einsetzen, bewerten Sie bitte trotzdem ihre Nützlichkeit.

Skalenniveau: nominal

0 - explicit missing (weiss nicht)

leeres Feld - implicit missing (nicht ausgefüllt)

- 1 - Finde ich gar nicht nützlich (1)
  - 2 - 2
  - 3 - 3
  - 4 - 4
  - 5 - Finde ich sehr nützlich (5)
- v14 - Komplexe Teilfrage: Welche der folgenden technischen Mittel wenden Sie in **Ihrer Institution** im Bereich *Berichtswesen und Diagnostik* an? Und wie nützlich finden Sie diese? Falls Sie eine Technologie nicht einsetzen, bewerten Sie bitte trotzdem ihre Nützlichkeit. §Softwarelösung für Diagnostik und Entwicklungsplanung
  - v14U2 - Teilfrage: Welche der folgenden technischen Mittel wenden Sie in **Ihrer Institution** im Bereich *Berichtswesen und Diagnostik* an? Und wie nützlich finden Sie diese? Falls Sie eine Technologie nicht einsetzen, bewerten Sie bitte trotzdem ihre Nützlichkeit. §Spezialisierte Softwarelösungen im Bereich Berichtswesen
  - v14U3 - Teilfrage: Welche der folgenden technischen Mittel wenden Sie in **Ihrer Institution** im Bereich *Berichtswesen und Diagnostik* an? Und wie nützlich finden Sie diese? Falls Sie eine Technologie nicht einsetzen, bewerten Sie bitte trotzdem ihre Nützlichkeit. §Telekonsultation ("Telemedizin")
  - v14U4 - Teilfrage: Welche der folgenden technischen Mittel wenden Sie in **Ihrer Institution** im Bereich *Berichtswesen und Diagnostik* an? Und wie nützlich finden Sie diese? Falls Sie eine Technologie nicht einsetzen, bewerten Sie bitte trotzdem ihre Nützlichkeit. §Automatisierte Kontrolle von Vitalfunktionen (z.B. Blutzuckermessung, Fitness Tracker)
  - v14U5 - Teilfrage: Welche der folgenden technischen Mittel wenden Sie in **Ihrer Institution** im Bereich *Berichtswesen und Diagnostik* an? Und wie nützlich finden Sie diese? Falls Sie eine Technologie nicht einsetzen, bewerten Sie bitte trotzdem ihre Nützlichkeit. §Spezialisierte Softwarelösungen im Bereich interne Dokumentation (z.B. Journal, ePflegedokumentation)
  - v14U6 - Teilfrage: Welche der folgenden technischen Mittel wenden Sie in **Ihrer Institution** im Bereich *Berichtswesen und Diagnostik* an? Und wie nützlich finden Sie diese? Falls Sie eine Technologie nicht einsetzen, bewerten Sie bitte trotzdem ihre Nützlichkeit. §Cloud-Lösung für Daten der Klientel

## v15

### Spalte Spalte 14

Welche der folgenden technischen Mittel wenden Sie in **Ihrer Institution** im Bereich *Sicherheit der Klientel* an? Und wie nützlich finden Sie diese? Falls Sie eine Technologie nicht einsetzen, bewerten Sie bitte trotzdem ihre Nützlichkeit.

Skalenniveau: nominal

0 - explicit missing (weiss nicht)

leeres Feld - implicit missing (nicht ausgefüllt)

- 1 - Ja
  - 2 - Nein
- v15 - Komplexe Teilfrage: Welche der folgenden technischen Mittel wenden Sie in **Ihrer Institution** im Bereich *Sicherheit der Klientel* an? Und wie nützlich finden Sie diese? Falls Sie eine Technologie nicht einsetzen, bewerten Sie bitte trotzdem ihre Nützlichkeit. §Kontakt- oder Sturzmatten
  - v15U2 - Teilfrage: Welche der folgenden technischen Mittel wenden Sie in **Ihrer Institution** im Bereich *Sicherheit der Klientel* an? Und wie nützlich finden Sie diese? Falls Sie eine Technologie nicht einsetzen, bewerten Sie bitte trotzdem ihre Nützlichkeit. §Bewegungsmelder oder intelligente Beleuchtung
  - v15U3 - Teilfrage: Welche der folgenden technischen Mittel wenden Sie in **Ihrer Institution** im Bereich *Sicherheit der Klientel* an? Und wie nützlich finden Sie diese? Falls Sie eine Technologie nicht einsetzen, bewerten Sie bitte trotzdem ihre Nützlichkeit. §Elektronische Schliesssysteme
  - v15U4 - Teilfrage: Welche der folgenden technischen Mittel wenden Sie in **Ihrer Institution** im Bereich *Sicherheit der Klientel* an? Und wie nützlich finden Sie diese? Falls Sie eine Technologie nicht einsetzen, bewerten Sie bitte trotzdem ihre Nützlichkeit. §Videoüberwachung
  - v15U5 - Teilfrage: Welche der folgenden technischen Mittel wenden Sie in **Ihrer Institution** im Bereich *Sicherheit der Klientel* an? Und wie nützlich finden Sie diese? Falls Sie eine Technologie nicht einsetzen, bewerten Sie bitte trotzdem ihre Nützlichkeit. §Automatisiertes Notfallsystem
  - v15U6 - Teilfrage: Welche der folgenden technischen Mittel wenden Sie in **Ihrer Institution** im Bereich *Sicherheit der Klientel* an? Und wie nützlich finden Sie diese? Falls Sie eine Technologie nicht einsetzen, bewerten Sie bitte trotzdem ihre Nützlichkeit. §GPS-basierte Ortung
  - v15U7 - Teilfrage: Welche der folgenden technischen Mittel wenden Sie in **Ihrer Institution** im Bereich *Sicherheit der Klientel* an? Und wie nützlich finden Sie diese? Falls Sie eine Technologie nicht einsetzen, bewerten Sie bitte trotzdem ihre Nützlichkeit. §Technik im Bereich Smarthome (z.B. automatische Storen, Sensor-basierte Haustechnik)

## v16

Spalte Spalte 15

Welche der folgenden technischen Mittel wenden Sie in **Ihrer Institution** im Bereich *Sicherheit der Klientel* an? Und wie nützlich finden Sie diese? Falls Sie eine Technologie nicht einsetzen, bewerten Sie bitte trotzdem ihre Nützlichkeit.

Skalenniveau: nominal

0 - explicit missing (weiss nicht)

leeres Feld - implicit missing (nicht ausgefüllt)

- 1 - Finde ich gar nicht nützlich (1)
  - 2 - 2
  - 3 - 3
  - 4 - 4
  - 5 - Finde ich sehr nützlich (5)
- v16 - Komplexe Teilfrage: Welche der folgenden technischen Mittel wenden Sie in **Ihrer Institution** im Bereich *Sicherheit der Klientel* an? Und wie nützlich finden Sie diese? Falls Sie eine Technologie nicht einsetzen, bewerten Sie bitte trotzdem ihre Nützlichkeit. § Kontakt- oder Sturzmatten
  - v16U2 - Teilfrage: Welche der folgenden technischen Mittel wenden Sie in **Ihrer Institution** im Bereich *Sicherheit der Klientel* an? Und wie nützlich finden Sie diese? Falls Sie eine Technologie nicht einsetzen, bewerten Sie bitte trotzdem ihre Nützlichkeit. § Bewegungsmelder oder intelligente Beleuchtung
  - v16U3 - Teilfrage: Welche der folgenden technischen Mittel wenden Sie in **Ihrer Institution** im Bereich *Sicherheit der Klientel* an? Und wie nützlich finden Sie diese? Falls Sie eine Technologie nicht einsetzen, bewerten Sie bitte trotzdem ihre Nützlichkeit. § Elektronische Schliesssysteme
  - v16U4 - Teilfrage: Welche der folgenden technischen Mittel wenden Sie in **Ihrer Institution** im Bereich *Sicherheit der Klientel* an? Und wie nützlich finden Sie diese? Falls Sie eine Technologie nicht einsetzen, bewerten Sie bitte trotzdem ihre Nützlichkeit. § Videoüberwachung
  - v16U5 - Teilfrage: Welche der folgenden technischen Mittel wenden Sie in **Ihrer Institution** im Bereich *Sicherheit der Klientel* an? Und wie nützlich finden Sie diese? Falls Sie eine Technologie nicht einsetzen, bewerten Sie bitte trotzdem ihre Nützlichkeit. § Automatisiertes Notfallsystem
  - v16U6 - Teilfrage: Welche der folgenden technischen Mittel wenden Sie in **Ihrer Institution** im Bereich *Sicherheit der Klientel* an? Und wie nützlich finden Sie diese? Falls Sie eine Technologie nicht einsetzen, bewerten Sie bitte trotzdem ihre Nützlichkeit. § GPS-basierte Ortung
  - v16U7 - Teilfrage: Welche der folgenden technischen Mittel wenden Sie in **Ihrer Institution** im Bereich *Sicherheit der Klientel* an? Und wie nützlich finden Sie diese? Falls Sie eine Technologie nicht einsetzen, bewerten Sie bitte trotzdem ihre Nützlichkeit. § Technik im Bereich Smarthome (z.B. automatische Storen, Sensor-basierte Haustechnik)

## v17

Wie wichtig ist Ihnen, dass in **Ihrer Institution** in den unten aufgeführten Bereichen moderne Technologie eingesetzt wird?

Skalenniveau: ordinal

0 - explicit missing (weiss nicht)

leeres Feld - implicit missing (nicht ausgefüllt)

- 1 - Gar nicht wichtig (1) 2 - 2 3 - 3 4 - 4 5 - Sehr wichtig (5)
- v17 - Teilfrage: Zugang zum Internet für Mitarbeitende
- v17U2 - Teilfrage: Zugang zum Internet für Klientel
- v17U3 - Teilfrage: Unterhaltung, Aktivierung und Entwicklung der Klientel
- v17U4 - Teilfrage: Bildung, Arbeit und Tagesgestaltung der Klientel
- v17U5 - Teilfrage: Betreuung und Pflege
- v17U6 - Teilfrage: Berichtswesen und Diagnostik
- v17U7 - Teilfrage: Sicherheit der Klientel

## v18

Inwiefern hindern die folgenden Punkte die **Einführung** von technischen Neuerungen?

Skalenniveau: ordinal

0 - explicit missing (weiss nicht)

leeres Feld - implicit missing (nicht ausgefüllt)

- 1 - Hindert mich stark (1) 2 - 2 3 - 3 4 - 4 5 - Hindert mich gar nicht (5)
- v18 - Teilfrage: Zu hohe Kosten
- v18U2 - Teilfrage: Fehlende Kompetenzen der Mitarbeitenden
- v18U3 - Teilfrage: Fehlende Infrastruktur
- v18U4 - Teilfrage: Fehlende fachliche/technische Unterstützung
- v18U5 - Teilfrage: Fehlende gesetzliche Vorgaben und Auflagen
- v18U6 - Teilfrage: Bestehende gesetzliche Vorgaben und Auflagen

## v19

Wie gut sind Ihr **Klientel** und Ihre **Mitarbeitenden** Ihrer Meinung nach über technische Neuentwicklungen informiert?

Skalenniveau: ordinal

0 - explicit missing (weiss nicht)

leeres Feld - implicit missing (nicht ausgefüllt)

1 - Gar nicht informiert (1) 2 - 2 3 - 3 4 - 4 5 - Voll und ganz informiert (5)

■ v19 - Teilfrage: **Klientel**

■ v19U2 - Teilfrage: **Mitarbeitende**

## v20

Wie häufig wird in Ihrer Institution über technische Neuerungen im Arbeitsfeld informiert, zum Beispiel in Form von Newsletter, Weiterbildung oder Anwendungstests?

Skalenniveau: nominal

0 - explicit missing (weiss nicht)

leeres Feld - implicit missing (nicht ausgefüllt)

1 - Nie

2 - 1 Mal pro Jahr

3 - Mehrmals pro Jahr

## v21

Sind Sie überzeugt, dass Ihre **Klientel** und Ihre **Mitarbeitenden** von technischen Neuerungen profitieren (z.B. Erleichterungen, Vermeidung von Fehlern)?

Skalenniveau: ordinal

0 - explicit missing (weiss nicht)

leeres Feld - implicit missing (nicht ausgefüllt)

1 - Gar nicht überzeugt (1) 2 - 2 3 - 3 4 - 4 5 - Voll und ganz überzeugt (5)

■ v21 - Teilfrage: **Klientel**

■ v21U2 - Teilfrage: **Mitarbeitende**

## v22

Inwiefern stimmen Sie der folgenden Aussage zu: "Die Vorteile von Technik sind für meine Institution grösser als deren Nachteile"

Skalenniveau: ordinal

0 - explicit missing (weiss nicht)

leeres Feld - implicit missing (nicht ausgefüllt)

1 - 1 Stimme gar nicht zu 2 - 2 3 - 3 4 - 4 5 - 5 Stimme voll und ganz zu

## v23

Wie wichtig ist Ihnen, dass bereits andere Institutionen vor Ihnen neue technische Mittel eingeführt haben?

Skalenniveau: ordinal

0 - explicit missing (weiss nicht)

leeres Feld - implicit missing (nicht ausgefüllt)

1 - 1 Gar nicht wichtig 2 - 2 3 - 3 4 - 4 5 - 5 Sehr wichtig

## v24

Inwieweit können die **Klientel**, ihre **Angehörigen** und die **Mitarbeitenden** über die Anschaffung von technischen Mitteln mitentscheiden?

Skalenniveau: ordinal

0 - explicit missing (weiss nicht)

leeres Feld - implicit missing (nicht ausgefüllt)

1 - Nie (1) 2 - 2 3 - 3 4 - 4 5 - Immer (5)

■ v24 - Teilfrage: Die **Klientel** können mitentscheiden

■ v24U2 - Teilfrage: Die **Angehörigen** können mitentscheiden

■ v24U3 - Teilfrage: Die **Mitarbeitende** können mitentscheiden

## v25

Nachfolgenden kommen Aussagen zur Einführung neuer Technologien. Wie häufig treffen diese bei Ihnen zu?

Skalenniveau: ordinal

0 - explicit missing (weiss nicht)

leeres Feld - implicit missing (nicht ausgefüllt)

1 - Nie (1) 2 - 2 3 - 3 4 - 4 5 - Immer (5)

■ v25 - Teilfrage: Sind **Sie** (als **Leitung**) frei in der Entscheidung, welche technischen Mittel in Ihrer Institution eingesetzt werden?

■ v25U2 - Teilfrage: Kann sich Ihre **Klientel** abschliessend gegen die Einführung einer technischen Neuerung entscheiden?

■ v25U3 - Teilfrage: Wie häufig evaluieren Sie den Einsatz neuer Technologien?

## v26

Wie wichtig ist Ihnen, dass die **Klientel** und die **Mitarbeitenden** an neuen Geräten/Technologien geschult werden (z.B. durch



IT-Firma/Abteilung)?

Skalenniveau: ordinal

0 - explicit missing (weiss nicht)

leeres Feld - implicit missing (nicht ausgefüllt)

1 - Gar nicht wichtig (1) 2 - 2 3 - 3 4 - 4 5 - Sehr wichtig (5)

■ v26 - Teilfrage: Schulung der **Klientel**

■ v26U2 - Teilfrage: Schulung der **Mitarbeitenden**

## v27

Wünschen Sie sich ein besseres Informationsangebot in Bezug auf technische Neuerungen in Ihrem Arbeitsfeld?

Skalenniveau: ordinal

0 - explicit missing (weiss nicht)

leeres Feld - implicit missing (nicht ausgefüllt)

1 - 1 Nein, gar nicht 2 - 2 3 - 3 4 - 4 5 - 5 Ja, sehr

## v28

Wie und wo würden Sie gerne vermehrt Informationen zu technischen Neuerungen erhalten?

Skalenniveau: nominal

leeres Feld - implicit missing (nicht ausgefüllt)

1 - Newsletter

2 - Ausbildung

3 - Tagungen / Weiterbildungen

4 - Broschüren

Mehrfachantworten: v28\_1 v28\_2 v28\_3 v28\_4

v28k Kommentarbox in der Variablen

## v29

Wer sollte dieses Informationsangebot bereitstellen?

Skalenniveau: nominal

leeres Feld - implicit missing (nicht ausgefüllt)

1 - IT / Technikfirmen

2 - Eigene Institution

3 - CURAVIVA Schweiz

4 - CURAVIVA Kantonalsektionen

5 - Ausbildungsstätten

6 - Berufs- / Fachverbände

7 - Stiftung / Trägerschaft mit mehreren Institutionen

8 - Politische Entscheidungsträger

Mehrfachantworten: v29\_1 v29\_2 v29\_3 v29\_4 v29\_5 v29\_6 v29\_7 v29\_8

v29k Kommentarbox in der Variablen

## v30

In welchen Bereichen braucht es Ihrer Meinung nach ein verbessertes Angebot, damit der Zugang zu technischen Neuerungen einfacher wird?

Skalenniveau: nominal

leeres Feld - implicit missing (nicht ausgefüllt)

1 - Ausbildung

2 - Hilfestellung durch Hersteller vor Ort

3 - Kodex / rechtliche Rahmenbedingungen

4 - Finanzierung

Mehrfachantworten: v30\_1 v30\_2 v30\_3 v30\_4

v30k Kommentarbox in der Variablen

## v31

Wenn Sie eine technische Neuerung bereitstellen, wie viel Überzeugungsarbeit benötigen Sie, bis Ihr **Klientel** und Ihre **Mitarbeitenden** vom Nutzen der Neuerung überzeugt sind?

Skalenniveau: ordinal

0 - explicit missing (weiss nicht)

leeres Feld - implicit missing (nicht ausgefüllt)

1 - Es braucht viel Überzeugungsarbeit (1) 2 - 2 3 - 3 4 - 4 5 - Es braucht keine Überzeugungsarbeit (5)

■ v31 - Teilfrage: **Klientel**

■ v31U2 - Teilfrage: **Mitarbeitende**

## v32

Wo sehen Sie aktuellen und künftigen Klärungsbedarf? Was sind grössere Bedenken, die Sie bei der Klientel und den Mitarbeitenden erkennen?

Skalenniveau: nominal

leeres Feld - implicit missing (nicht ausgefüllt)

- 1 - Sicherheitsbedenken (Sicherheit in der Bedienung und Zuverlässigkeit der Technik)
- 2 - Aufwand zum Erlernen der Bedienung
- 3 - Ängste bei der Bedienung
- 4 - Ethische Bedenken
- 5 - Klärung der Nutzung privater Geräte und damit verbundenen Software (z.B. Whatsapp) im Arbeitskontext
- 6 - Datenschutzbedenken
- 7 - Erkennen der Nützlichkeit von Technik
- 8 - Ängste vor Überwachung
- 9 - Bedrohung des eigenen Arbeitsplatzes

Mehrfachantworten: v32\_1 v32\_2 v32\_3 v32\_4 v32\_5 v32\_6 v32\_7 v32\_8 v32\_9

v32k Kommentarbox in der Variablen

## v33

Spalte Geburtsjahr (Format 19XY)

Bitte geben Sie nachfolgend die erforderlichen Informationen zu Ihrer Person ein.

Skalenniveau: metrisch

leeres Feld - implicit missing (nicht ausgefüllt)

■ v33 - Komplexe Teilfrage: Bitte geben Sie nachfolgend die erforderlichen Informationen zu Ihrer Person ein. \$leer

v33k Kommentarbox in der Variablen

## v34

Spalte Geschlecht

Bitte geben Sie nachfolgend die erforderlichen Informationen zu Ihrer Person ein.

Skalenniveau: nominal

leeres Feld - implicit missing (nicht ausgefüllt)

- 1 - Männlich
- 2 - Weiblich

■ v34 - Komplexe Teilfrage: Bitte geben Sie nachfolgend die erforderlichen Informationen zu Ihrer Person ein. \$leer

v34k Kommentarbox in der Variablen

## v35

Spalte Höchste abgeschlossene Bildung

Bitte geben Sie nachfolgend die erforderlichen Informationen zu Ihrer Person ein.

Skalenniveau: nominal

leeres Feld - implicit missing (nicht ausgefüllt)

- 1 - Sekundarstufe II
- 2 - Höhere Berufsbildung
- 3 - Bachelor oder äquivalent
- 4 - Master oder äquivalent (Lizentiat)
- 5 - Doktorat

■ v35 - Komplexe Teilfrage: Bitte geben Sie nachfolgend die erforderlichen Informationen zu Ihrer Person ein. \$leer

v35k Kommentarbox in der Variablen

## v36

Spalte Aktuelle Funktionsbezeichnung (siehe dazu auch das Kommentarfeld)

Bitte geben Sie nachfolgend die erforderlichen Informationen zu Ihrer Person ein.

Skalenniveau: nominal

leeres Feld - implicit missing (nicht ausgefüllt)

- 1 - Institutionsleitung (Haus-, Gesamtleitung)
- 2 - Andere Funktion

■ v36 - Komplexe Teilfrage: Bitte geben Sie nachfolgend die erforderlichen Informationen zu Ihrer Person ein. \$leer

v36k Kommentarbox in der Variablen

## v37

Spalte Seit wie vielen Jahren arbeiten Sie in dieser Funktion?

Bitte geben Sie nachfolgend die erforderlichen Informationen zu Ihrer Person ein.

Skalenniveau: nominal

leeres Feld - implicit missing (nicht ausgefüllt)

- 1 - !!ZAHL

■ v37 - Komplexe Teilfrage: Bitte geben Sie nachfolgend die erforderlichen Informationen zu Ihrer Person ein. \$leer

v37k Kommentarbox in der Variablen

## v38

Gelten die von Ihnen gemachten Aussagen für eine oder zwei/mehrere Institutionen ("Häuser")?

Skalenniveau: nominal

leeres Feld - implicit missing (nicht ausgefüllt)

- 1 - Für eine Institution ("Haus")
- 2 - Für zwei oder mehr Institutionen ("Häuser")

## v39

Spalte Anzahl Betten/Plätze

Bitte geben Sie folgende Informationen zu Ihrer Institution an:

Skalenniveau: metrisch

leeres Feld - implicit missing (nicht ausgefüllt)

■ v39 - Komplexe Teilfrage: Bitte geben Sie folgende Informationen zu Ihrer Institution an:§leer

## v40

Spalte Standortkanton

Bitte geben Sie folgende Informationen zu Ihrer Institution an:

Skalenniveau: nominal

leeres Feld - implicit missing (nicht ausgefüllt)

- 1 - AG
- 2 - AI
- 3 - AR
- 4 - BE
- 5 - BL
- 6 - BS
- 7 - FR
- 8 - GE
- 9 - GL
- 10 - GR
- 11 - JU
- 12 - LU
- 13 - NE
- 14 - NW
- 15 - OW
- 16 - SG
- 17 - SH
- 18 - SO
- 19 - SZ
- 20 - TG
- 21 - TI
- 22 - UR
- 23 - VD
- 24 - VS
- 25 - ZG
- 26 - ZH

■ v40 - Komplexe Teilfrage: Bitte geben Sie folgende Informationen zu Ihrer Institution an:§leer

## v41

Spalte Gebiet

Bitte geben Sie folgende Informationen zu Ihrer Institution an:

Skalenniveau: nominal

leeres Feld - implicit missing (nicht ausgefüllt)

- 1 - Städtisch
- 2 - Ländlich
- 3 - Agglomeration

■ v41 - Komplexe Teilfrage: Bitte geben Sie folgende Informationen zu Ihrer Institution an:§leer

## v42

Spalte Durch wen wird der IT-Support hauptsächlich sichergestellt?

Bitte geben Sie folgende Informationen zu Ihrer Institution an:

Skalenniveau: nominal

0 - explicit missing (weiss nicht)

leeres Feld - implicit missing (nicht ausgefüllt)

- 1 - Externe Firma
- 2 - IT-Verantwortliche/r in der Institution mit Ausbildung im Bereich IT/Informatik

- 3 - Mitarbeitende aus nicht IT-Bereichen der Institution, die das Thema „nebenbei“ bearbeiten
- 4 - Stiftung/Trägerschaft
- 5 - Kombination: interne und externe IT-Mitarbeitende
- 6 - Keit IT-Support vorhanden
- v42 - Komplexe Teilfrage: Bitte geben Sie folgende Informationen zu Ihrer Institution an:§leer

## v43

Spalte Falls eine interne IT-Abteilung besteht, wie viele Stellenprozent (Vollzeitäquivalenz) stehen dafür zur Verfügung?

Bitte geben Sie folgende Informationen zu Ihrer Institution an:

Skalenniveau: nominal

leeres Feld - implicit missing (nicht ausgefüllt)

- 1 - freies Textfeld
  - v43 - Komplexe Teilfrage: Bitte geben Sie folgende Informationen zu Ihrer Institution an:§leer
- Textinhalt in der Variablen v43t

## v44

Spalte Spalte 6

Bitte geben Sie folgende Informationen zu Ihren Institutionen (pro **Haus** eine Zeile) an:

Skalenniveau: metrisch

leeres Feld - implicit missing (nicht ausgefüllt)

- v44 - Komplexe Teilfrage: Bitte geben Sie folgende Informationen zu Ihren Institutionen (pro **Haus** eine Zeile) an:§Haus 1
- v44U2 - Teilfrage: Bitte geben Sie folgende Informationen zu Ihren Institutionen (pro **Haus** eine Zeile) an:§Haus 2
- v44U3 - Teilfrage: Bitte geben Sie folgende Informationen zu Ihren Institutionen (pro **Haus** eine Zeile) an:§Haus 3
- v44U4 - Teilfrage: Bitte geben Sie folgende Informationen zu Ihren Institutionen (pro **Haus** eine Zeile) an:§Haus 4
- v44U5 - Teilfrage: Bitte geben Sie folgende Informationen zu Ihren Institutionen (pro **Haus** eine Zeile) an:§Haus 5

## v45

Spalte Spalte 7

Bitte geben Sie folgende Informationen zu Ihren Institutionen (pro **Haus** eine Zeile) an:

Skalenniveau: nominal

leeres Feld - implicit missing (nicht ausgefüllt)

- 1 - AG
- 2 - AI
- 3 - AR
- 4 - BE
- 5 - BL
- 6 - BS
- 7 - FR
- 8 - GE
- 9 - GL
- 10 - GR
- 11 - JU
- 12 - LU
- 13 - NE
- 14 - NW
- 15 - OW
- 16 - SG
- 17 - SH
- 18 - SO
- 19 - SZ
- 20 - TG
- 21 - TI
- 22 - UR
- 23 - VD
- 24 - VS
- 25 - ZG
- 26 - ZH
- v45 - Komplexe Teilfrage: Bitte geben Sie folgende Informationen zu Ihren Institutionen (pro **Haus** eine Zeile) an:§Haus 1
- v45U2 - Teilfrage: Bitte geben Sie folgende Informationen zu Ihren Institutionen (pro **Haus** eine Zeile) an:§Haus 2
- v45U3 - Teilfrage: Bitte geben Sie folgende Informationen zu Ihren Institutionen (pro **Haus** eine Zeile) an:§Haus 3
- v45U4 - Teilfrage: Bitte geben Sie folgende Informationen zu Ihren Institutionen (pro **Haus** eine Zeile) an:§Haus 4
- v45U5 - Teilfrage: Bitte geben Sie folgende Informationen zu Ihren Institutionen (pro **Haus** eine Zeile) an:§Haus 5

## v46

Spalte Spalte 8

Bitte geben Sie folgende Informationen zu Ihren Institutionen (pro **Haus** eine Zeile) an:

Skalenniveau: nominal

leeres Feld - implicit missing (nicht ausgefüllt)

- 1 - Städtisch
- 2 - Ländlich
- 3 - Agglomeration

- v46 - Komplexe Teilfrage: Bitte geben Sie folgende Informationen zu Ihren Institutionen (pro **Haus** eine Zeile) an:§Haus 1
- v46U2 - Teilfrage: Bitte geben Sie folgende Informationen zu Ihren Institutionen (pro **Haus** eine Zeile) an:§Haus 2
- v46U3 - Teilfrage: Bitte geben Sie folgende Informationen zu Ihren Institutionen (pro **Haus** eine Zeile) an:§Haus 3
- v46U4 - Teilfrage: Bitte geben Sie folgende Informationen zu Ihren Institutionen (pro **Haus** eine Zeile) an:§Haus 4
- v46U5 - Teilfrage: Bitte geben Sie folgende Informationen zu Ihren Institutionen (pro **Haus** eine Zeile) an:§Haus 5

## v47

Spalte Spalte 9

Bitte geben Sie folgende Informationen zu Ihren Institutionen (pro **Haus** eine Zeile) an:

Skalenniveau: nominal

0 - explicit missing (weiss nicht)

leeres Feld - implicit missing (nicht ausgefüllt)

- 1 - Externe Firma
- 2 - IT-Verantwortliche/r in der Institution mit Ausbildung im Bereich IT/Informatik
- 3 - Mitarbeitende aus nicht IT-Bereichen der Institution, die das Thema „nebenbei“ bearbeiten
- 4 - Stiftung/Trägerschaft
- 5 - Kombination: interne und externe IT-Mitarbeitende
- 6 - Kein IT-Support vorhanden

- v47 - Komplexe Teilfrage: Bitte geben Sie folgende Informationen zu Ihren Institutionen (pro **Haus** eine Zeile) an:§Haus 1
- v47U2 - Teilfrage: Bitte geben Sie folgende Informationen zu Ihren Institutionen (pro **Haus** eine Zeile) an:§Haus 2
- v47U3 - Teilfrage: Bitte geben Sie folgende Informationen zu Ihren Institutionen (pro **Haus** eine Zeile) an:§Haus 3
- v47U4 - Teilfrage: Bitte geben Sie folgende Informationen zu Ihren Institutionen (pro **Haus** eine Zeile) an:§Haus 4
- v47U5 - Teilfrage: Bitte geben Sie folgende Informationen zu Ihren Institutionen (pro **Haus** eine Zeile) an:§Haus 5

## v48

Spalte Spalte 10

Bitte geben Sie folgende Informationen zu Ihren Institutionen (pro **Haus** eine Zeile) an:

Skalenniveau: nominal

leeres Feld - implicit missing (nicht ausgefüllt)

- 1 - !!ZAHL

- v48 - Komplexe Teilfrage: Bitte geben Sie folgende Informationen zu Ihren Institutionen (pro **Haus** eine Zeile) an:§Haus 1
- v48U2 - Teilfrage: Bitte geben Sie folgende Informationen zu Ihren Institutionen (pro **Haus** eine Zeile) an:§Haus 2
- v48U3 - Teilfrage: Bitte geben Sie folgende Informationen zu Ihren Institutionen (pro **Haus** eine Zeile) an:§Haus 3
- v48U4 - Teilfrage: Bitte geben Sie folgende Informationen zu Ihren Institutionen (pro **Haus** eine Zeile) an:§Haus 4
- v48U5 - Teilfrage: Bitte geben Sie folgende Informationen zu Ihren Institutionen (pro **Haus** eine Zeile) an:§Haus 5

## v49

Wie kompetent erleben Sie die Mitarbeitenden in den unterschiedlichen Arbeitsbereichen in Ihrer Institution im Umgang mit Technologien?

Skalenniveau: ordinal

0 - explicit missing (weiss nicht)

leeres Feld - implicit missing (nicht ausgefüllt)

- 1 - Gar nicht kompetent (1) 2 - 2 3 - 3 4 - 4 5 - Sehr kompetent (5)

- v49 - Teilfrage: Betreuung/Pflege/Agogik/Schule/Therapie
- v49U2 - Teilfrage: Administration
- v49U3 - Teilfrage: Leitung/Stabsstellen
- v49U4 - Teilfrage: Informatik
- v49U5 - Teilfrage: Hausdienst/Hotellerie
- v49U6 - Teilfrage: Logistik/Unterhalt

## v50

In welchem Bereich ist Ihre Institution hauptsächlich tätig?

Skalenniveau: nominal

leeres Feld - implicit missing (nicht ausgefüllt)

- 1 - Kinder und Jugendliche
- 2 - (Erwachsene) Menschen mit Behinderung
- 3 - Menschen im Alter

Mehrfachantworten: v50\_1 v50\_2 v50\_3
